# Supplementary material for: Synthesis and characterization of carbon microtube/tantalum oxide composites and their photocatalytic activity under visible irradiation
Source: Royal Society of Chemistry journal article supplement (doi:10.1039/c5ra06812f), 2015-01-01
Supplement: c5ra06812f1.pdf [file c5ra06812f1.pdf]

## Electronic supplementary information

### Synthesis, characterization of carbon micro tube/tantalum oxide composites and their photocatalytic activity under visible irradiation

**K. Chennakesavulu<sup>a,b\*</sup> and G. Ramanjaneya Reddy<sup>c</sup>**

<sup>a</sup>Department of Chemistry, Sathyabama University, Sathyabama University, Jeppiaar Nagar, Rajiv Gandhi Salai, Chennai-600 119, India. Tel/Fax: +914424503814.

<sup>b</sup>Centre for Nano Science and Nano Technolgy, International Research Centre, Sathyabama University, Jeppiaar Nagar, Rajiv Gandhi Salai, Chennai-600 119. Email: [chennanml@yahoo.com](mailto:chennanml@yahoo.com)

<sup>c</sup>Department of Inorganic Chemistry, Guindy Campus, University of Madras, Chennai - 600 025.

#### Table of contents

| Fig. no | Figure caption                                                                                                         | Page no |
|---------|------------------------------------------------------------------------------------------------------------------------|---------|
| S1      | (a) XRD of Cotton fiber and (b) DRS UV of Ta <sub>2</sub> O <sub>5</sub>                                               | 2       |
| S2      | Cotton fiber FESEM come EDAX spectrum                                                                                  | 2       |
| S3      | FESEM/EDX spectrum of CMTs                                                                                             | 3       |
| S4      | TEM/EDX spectrum CMT:Ta <sub>2</sub>                                                                                   | 3       |
| S5      | Pore volume graphs the (a) CMT (b) CMT:Ta <sub>1</sub> (c) CMT:Ta <sub>2</sub> (d) CMT:Ta <sub>3</sub>                 | 4       |
| S6      | Particle size distribution of the (a) CMT (b) CMT:Ta <sub>1</sub> (c) CMT:Ta <sub>2</sub> (d) CMT:Ta <sub>3</sub>      | 5       |
| S7      | Absorption plots for the XO dye of the (a) CMT (b) CMT:Ta <sub>1</sub> (c) CMT:Ta <sub>2</sub> (d) CMT:Ta <sub>3</sub> | 6       |
| S8      | Absorption plots for the MO dye of the (a) CMT (b) CMT:Ta <sub>1</sub> (c) CMT:Ta <sub>2</sub> (d) CMT:Ta <sub>3</sub> | 7       |
| S9      | Raman spectra of the recovered catalysts of CMT:Ta <sub>2</sub>                                                        | 8       |
| S10     | Raman spectra of the recovered catalysts of CMT:Ta <sub>3</sub>                                                        | 8       |
| S11     | DRSUV/Visible spectra of the recovered photocatalyst of CMT:Ta <sub>2</sub> and CMT:Ta <sub>3</sub>                    | 9       |
| S12     | Powder XRD patterns of the recovered CMT:Ta <sub>3</sub> photocatalyst                                                 | 9       |

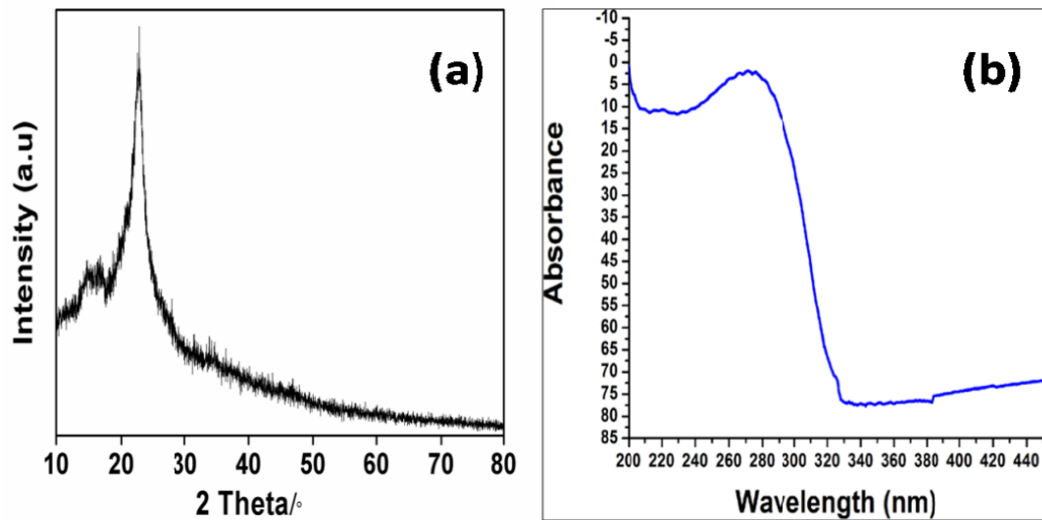

Fig. S1. (a) XRD of Cotton fiber and (b) DRS UV of Ta<sub>2</sub>O<sub>5</sub>

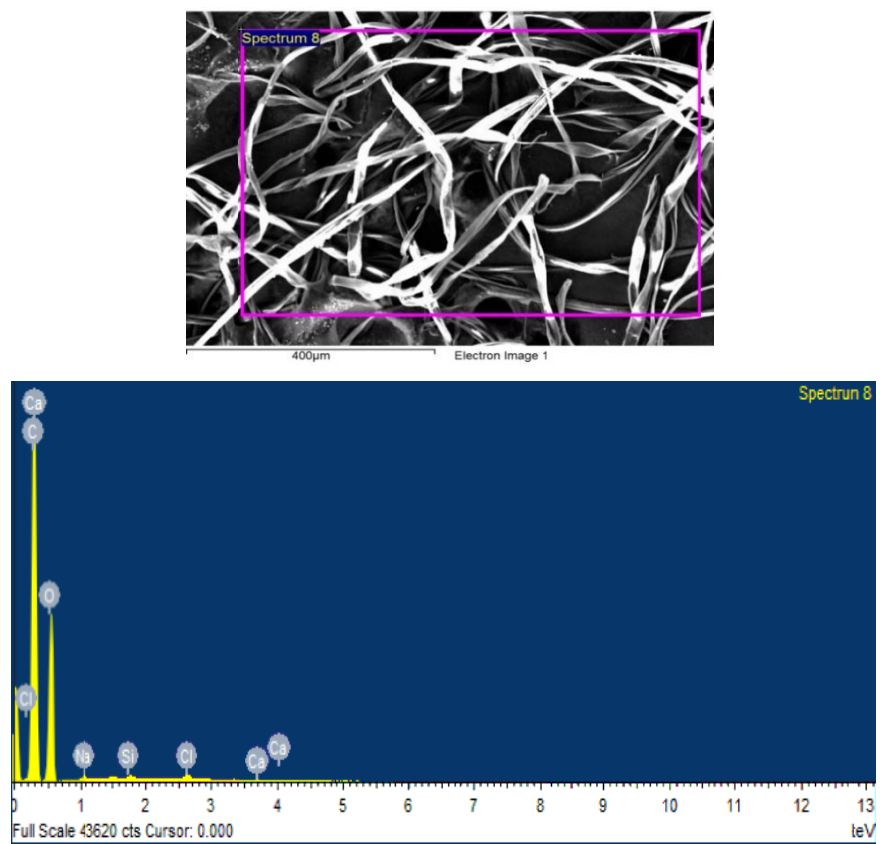

Fig.S2. Cotton fibers FESEM/EDAX spectrum

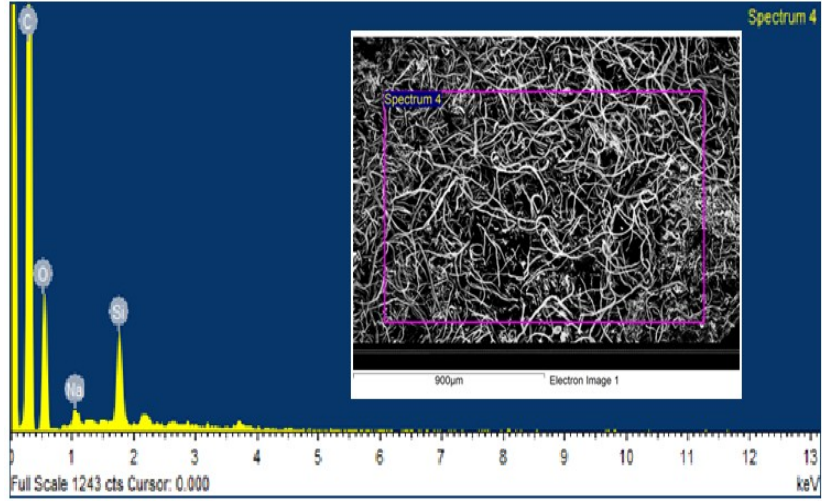

**Fig.S3.**FESEM/EDX spectrum of CMTs

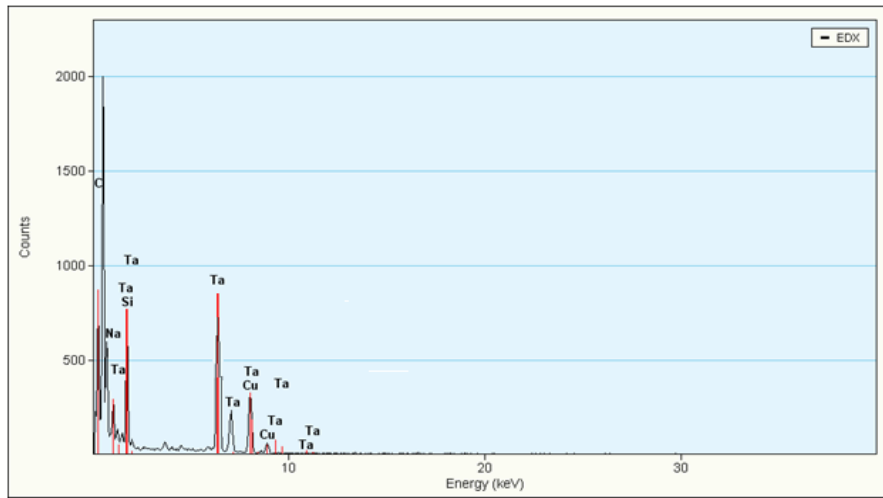

**Fig.S4.** TEM/EDX spectrum of CMT:Ta<sub>2</sub>

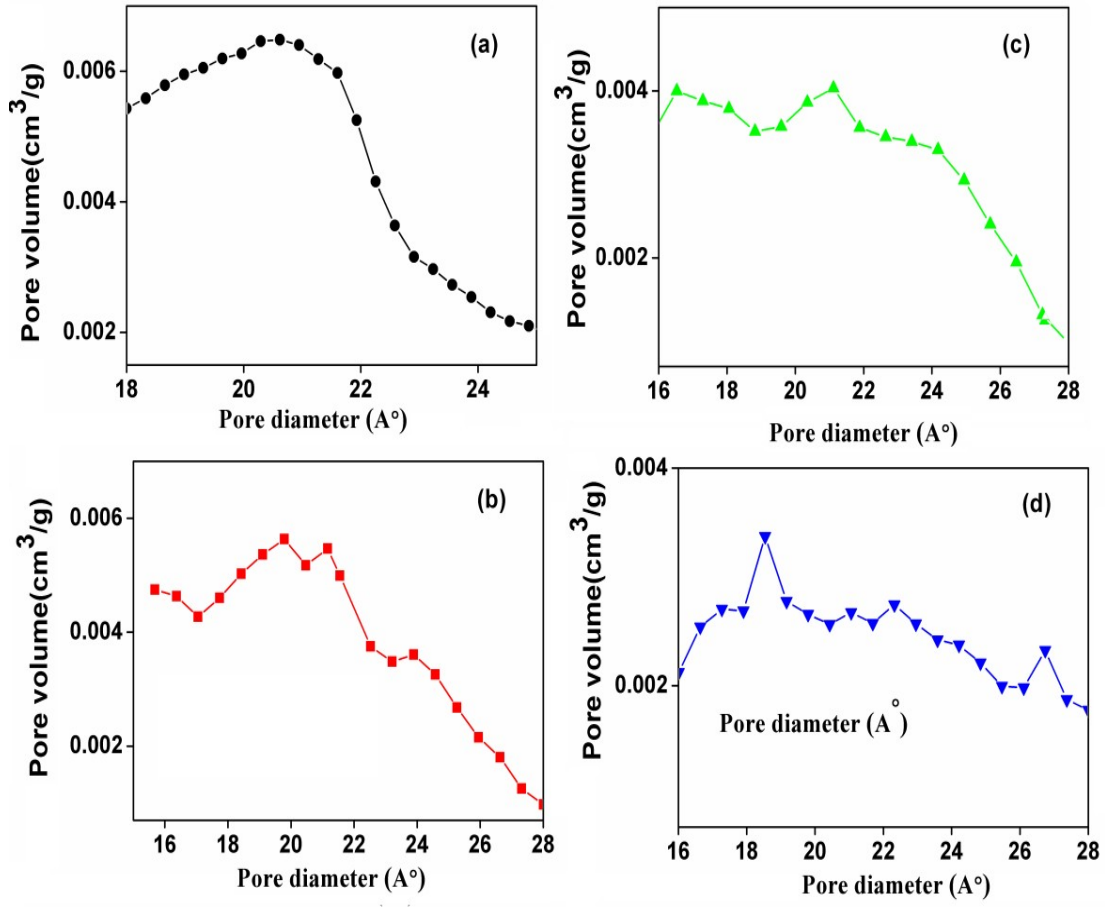

Fig. S5. B J H pore size distribution curves of the (a) CMT (b) CMT:Ta<sub>1</sub> (c) CMT:Ta<sub>2</sub> (d) CMT:Ta<sub>3</sub>

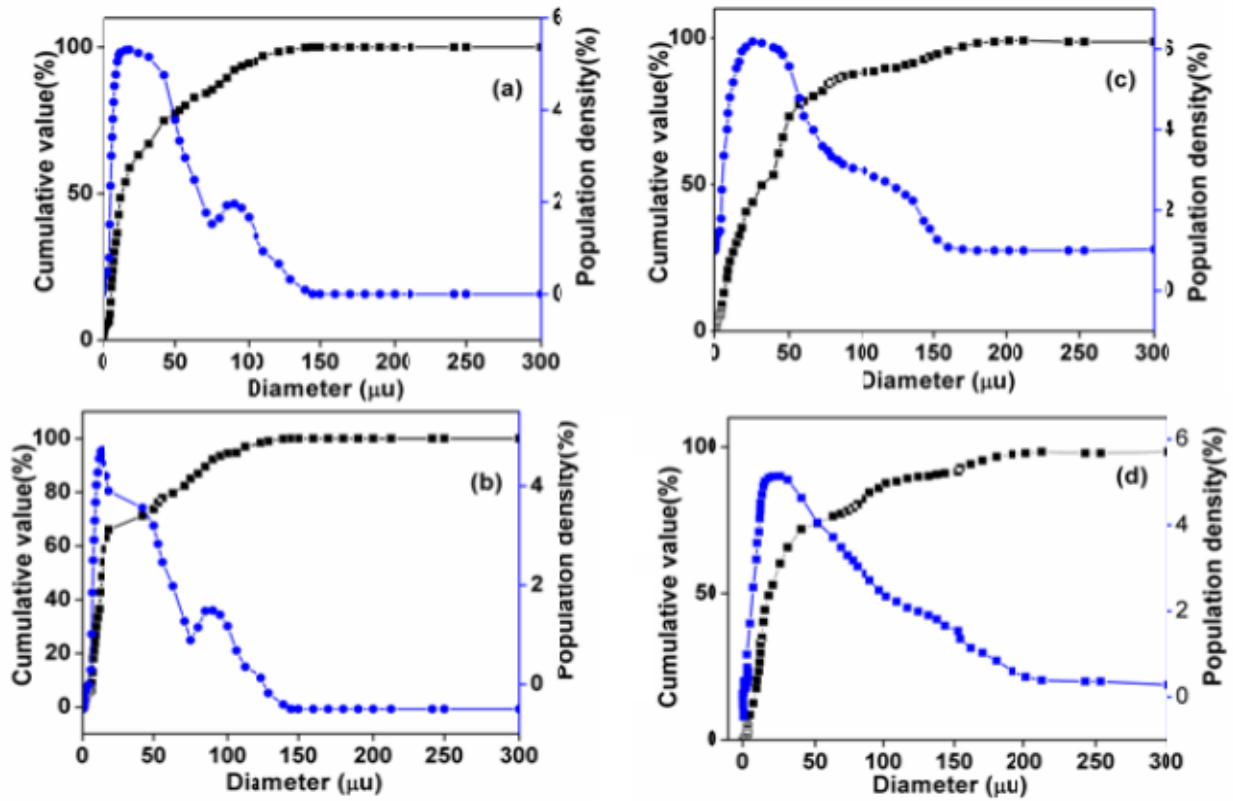

**Fig S6:** Particle size distribution of the (a) CMT (b) CMT:Ta<sub>1</sub> (c) CMT:Ta<sub>2</sub> (d) CMT:Ta<sub>3</sub> in ethanol medium (during the measurement sonification was applied)

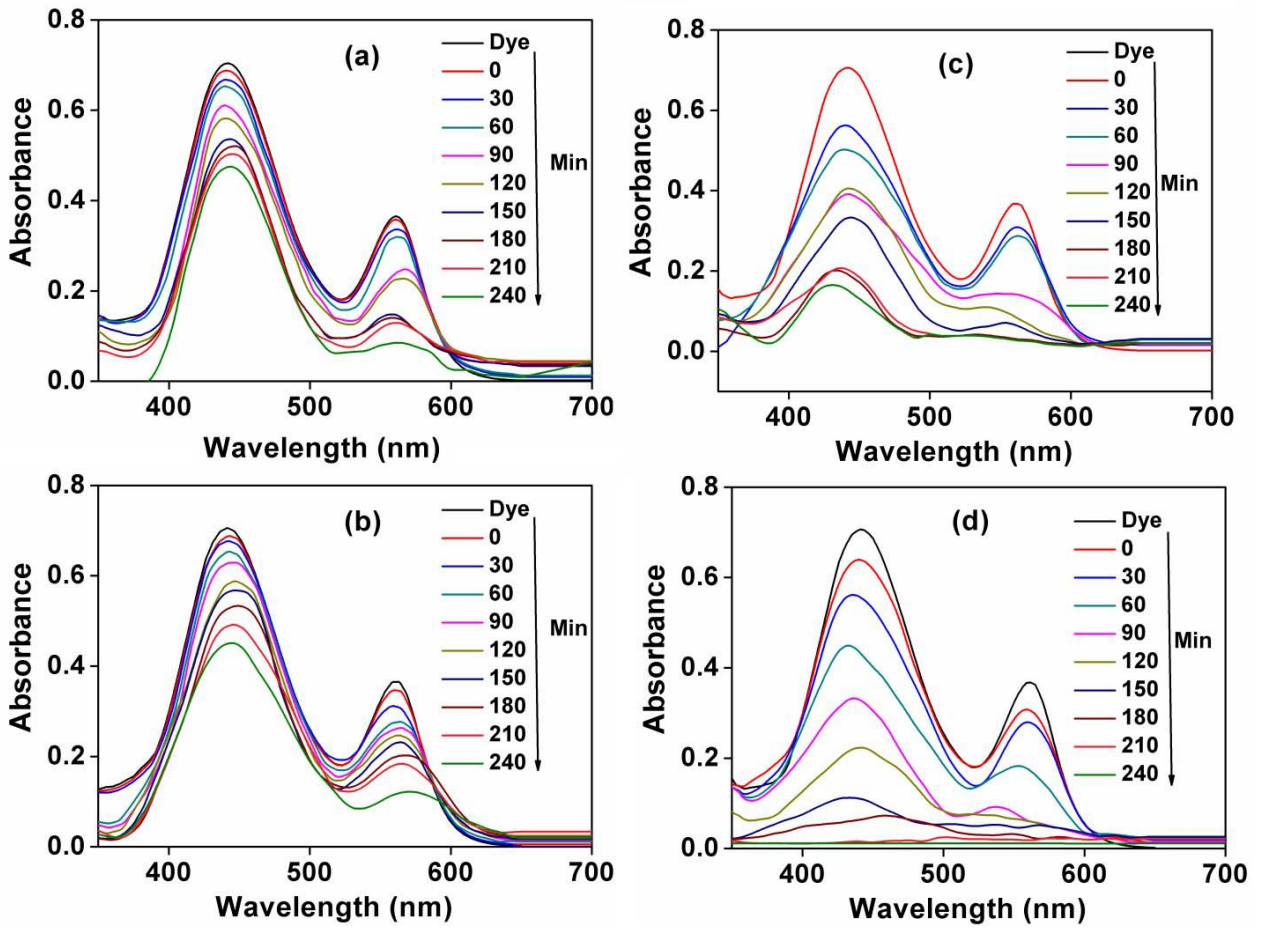

**Fig S7:** Absorption plots for the XO dye of the (a) CMT (b) CMT:Ta<sub>1</sub> (c) CMT:Ta<sub>2</sub> (d) CMT:Ta<sub>3</sub>

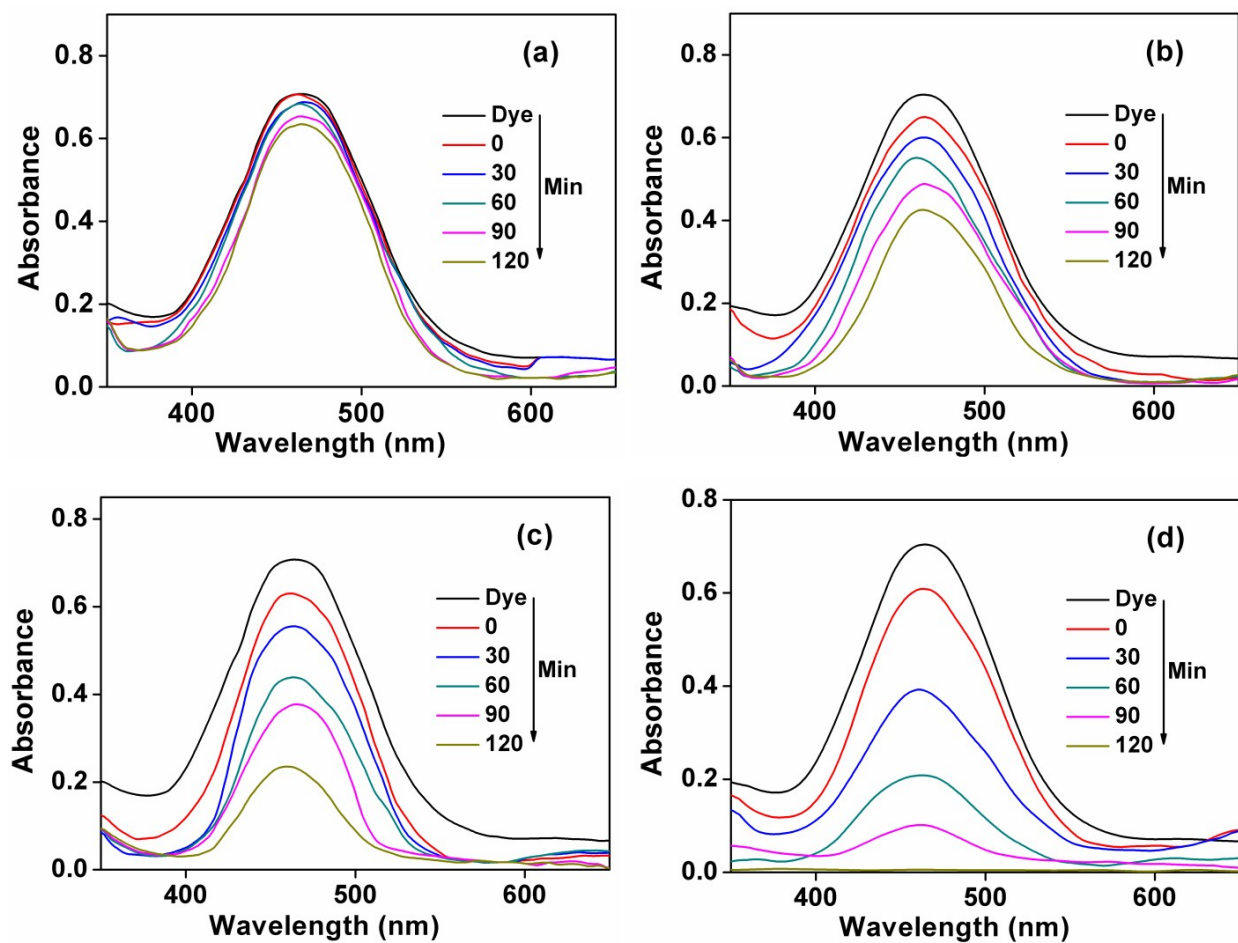

**Fig S8:** Absorption plots for the MO dye of the (a) CMT (b) CMT:Ta<sub>1</sub> (c) CMT:Ta<sub>2</sub> (d) CMT:Ta<sub>3</sub>

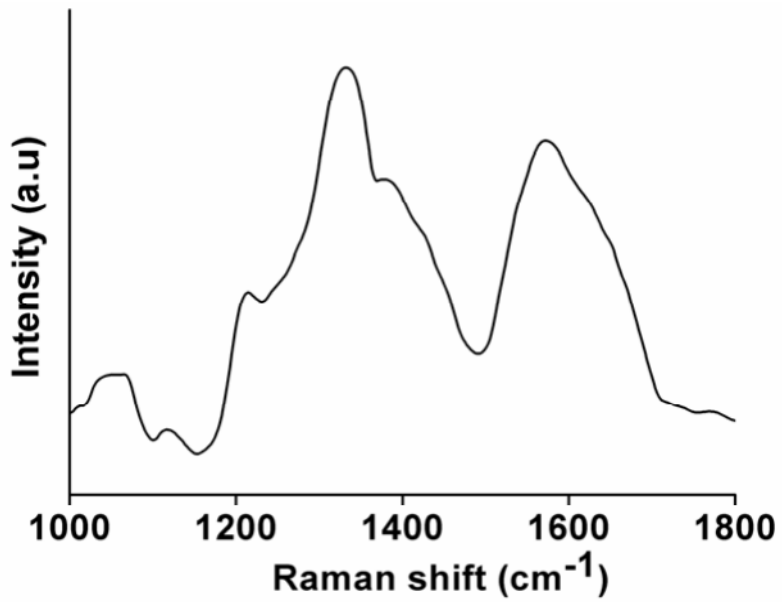

Fig S9: Raman spectrum of the ecovered catalysts of CMT:Ta<sub>2</sub> (Smoothed)

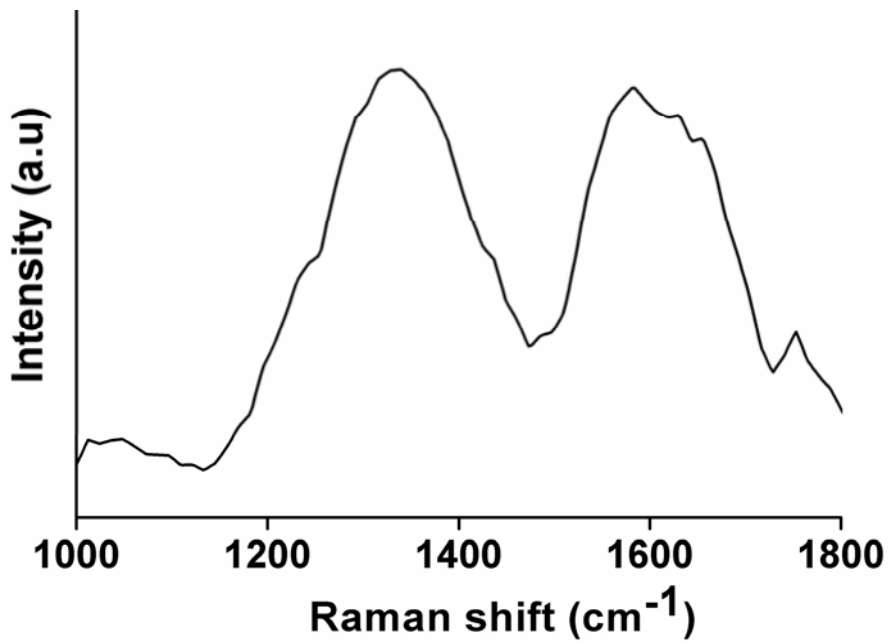

Fig S10: Raman spectrum of the recovered catalysts of CMT:Ta<sub>3</sub> (smoothed)



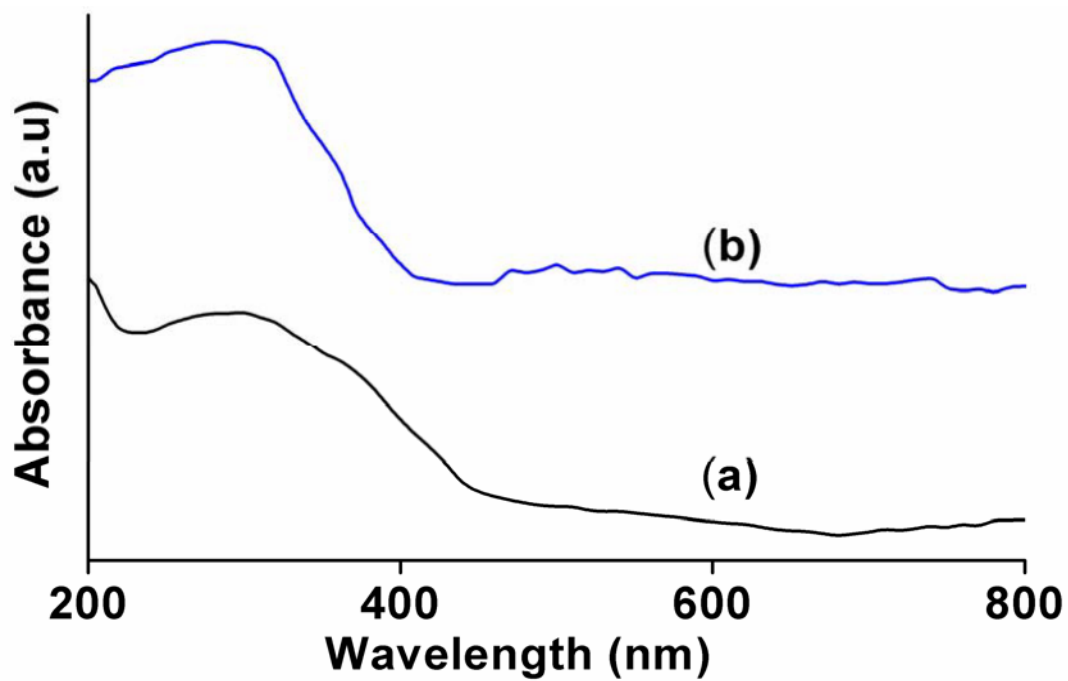

Fig.S11. DRSUV/Visible spectra of the recovered photocatalyst of CMT:Ta<sub>2</sub> and CMT:Ta<sub>3</sub>

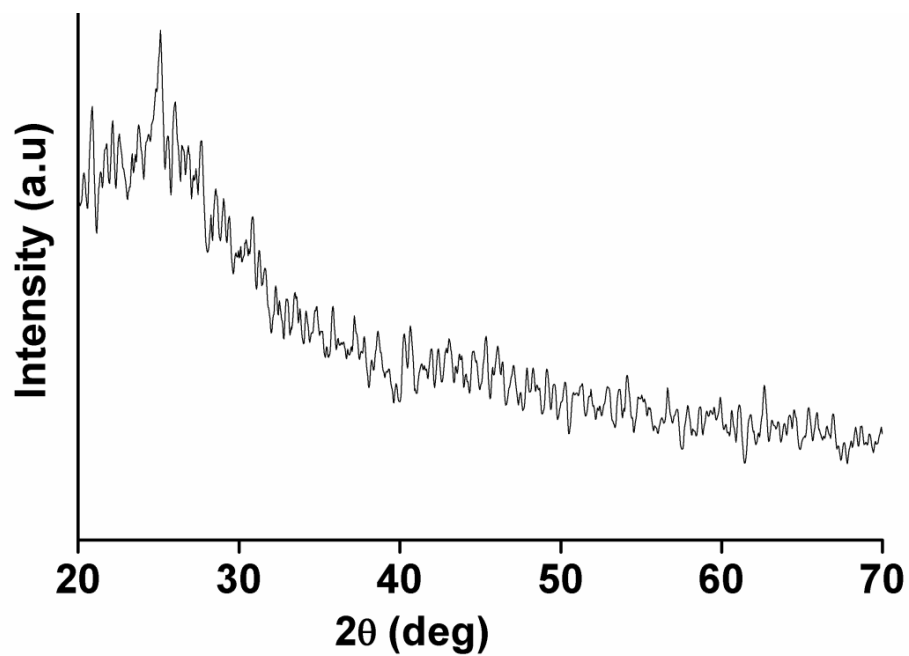

Fig.S12. Powder XRD patterns of the reused CMT:Ta<sub>3</sub> photocatalyst
